# Supplementary material
Source: publisher figshare collection journal article supplement (https://aacr.figshare.com/articles/dataset/_/22472795)
Supplement: Supplementary file 1 [file 39924302]

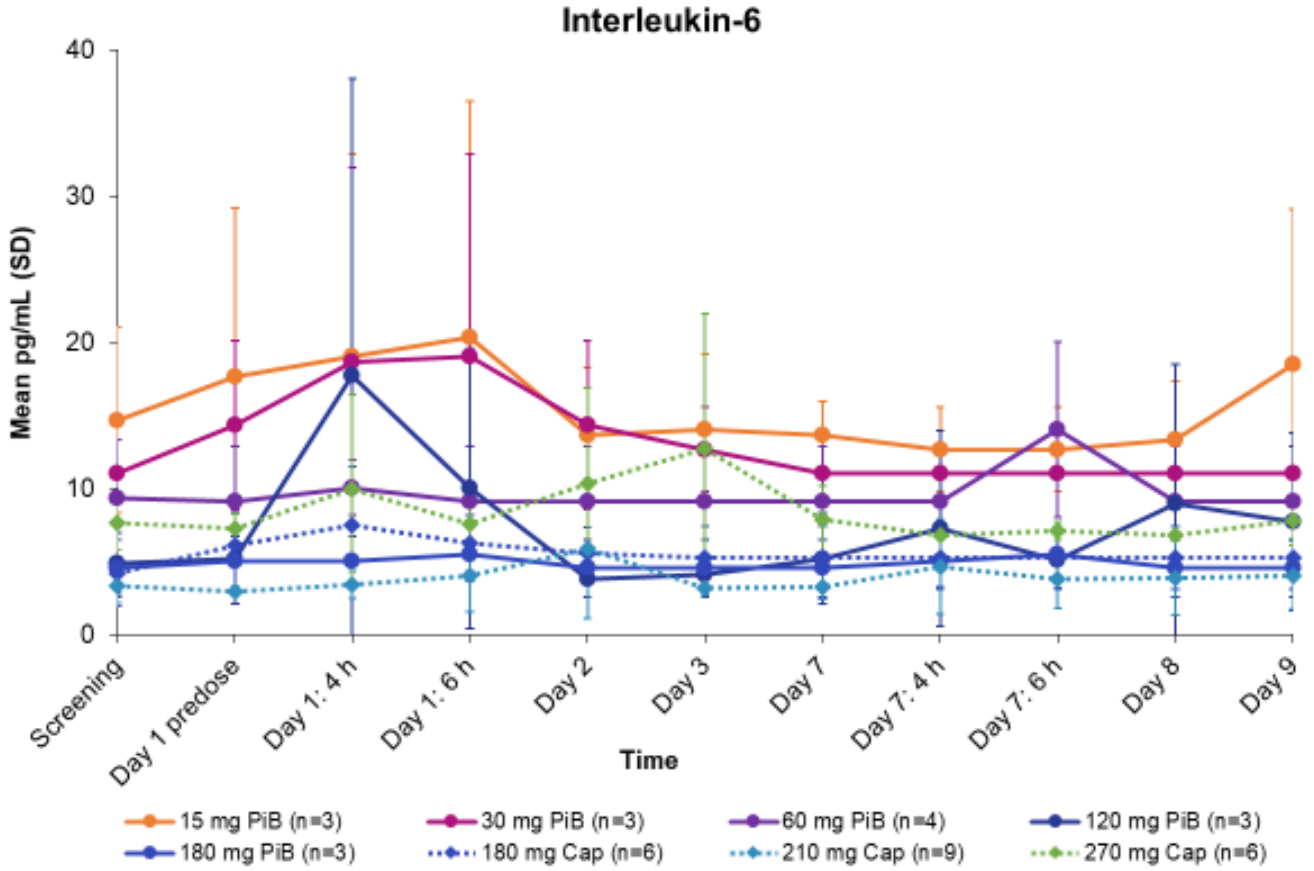

**Figure S2.**

Figure S2 shows changes in interleukin-6 in plasma from screening thru day 9 at the indicated doses. Cap, capsule.
